# Supplementary material
Source: HighWire-hosted journal article supplement (https://www.rcpjournals.org/highwire/filestream/12768/field_highwire_adjunct_files/5/S3._Characteristics_of_patients_responding_to_invitation_to_After_COVID_review..pdf)
Supplement: S3._Characteristics_of_patients_responding_to_invitation_to_After_COVID_review..pdf [file S3._Characteristics_of_patients_responding_to_invitation_to_After_COVID_review..pdf]

**a**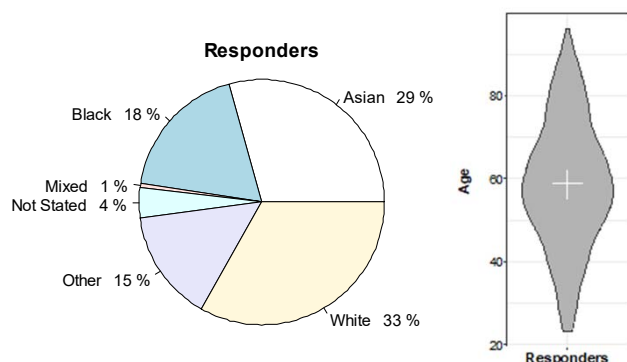**b**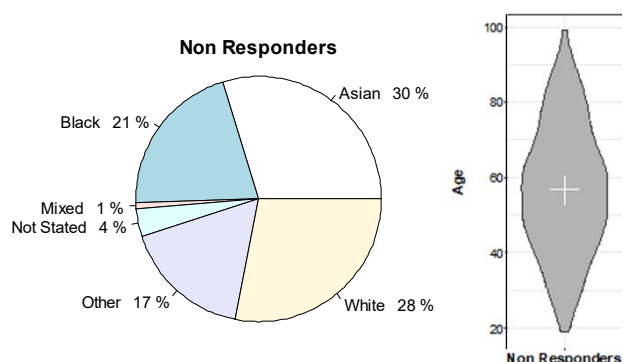**c**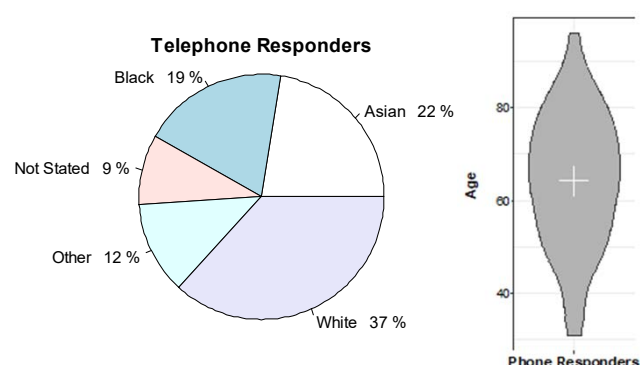

**S3. Characteristics of patients responding to invite to After COVID review.** Ethnicity (pie chart) and age distribution (violin plot with mean) of patients who by date of data extract had (a) responded and (b) not responded to invite to After COVID review following hospitalisation for COVID pneumonia. (c) Characteristics of a sample of patients completing the questionnaire by telephone.
